# Supplementary material
Source: publisher site journal article supplement (https://www.dovepress.com/get_supplementary_file.php?f=211818.docx)
Supplement: Supplementary file 1 [file get_supplementary_file.php]

**Table S1**: Correlations between clinical conditions of the patients and responses on day 3.

|  | **Early Responders 430** | **Early Non-Responders 68** | **P-value** |
| --- | --- | --- | --- |
| **Primary tumor site - n (%)** |  |  |  |
| Respiratory system | 123 (28.6) | 18 (26.5) | 0.3854 |
| Digestive system | 95 (22.1) | 19 (27.9) |  |
| Genitourinary system | 82 (19.1) | 12 (17.6) |  |
| Breast | 60 (14.0) | 5 (7.4) |  |
| Head/Neck | 33 (7.7) | 9 (13.2) |  |
| Other | 37 (8.6) | 5 (7.4) |  |
| **Presence of metastasis - n (%)** | 369 (85.8) | 55 (80.9) | 0.2880 |
| **Karnofski PS** |  |  |  |
| Mean (SD) | 67.1 (17.4) | 65.7 (14.5) | 0.4083 |
| Median (Q1 - Q3) | 70.0 (60.0-80.0) | 70.0 (60.0-80.0) |  |
| Min - Max | 20.0 - 100.0 | 30.0 - 90.0 |  |
| **Concomitant diseases - n (%)** | 275 (64.0) | 45 (66.2) | 0.7223 |
| **Therapy for concomitant diseases - n (%)** | 238 (86.5) | 40 (88.9) | 0.6661 |
| SD: standard deviation. Q1-Q3: first-third quartile. | | | |
